# Supplementary material for: Effects of thermal annealing on analog resistive switching behavior in bilayer HfO2/ZnO synaptic devices: the role of ZnO grain boundaries
Source: Royal Society of Chemistry journal article supplement (doi:10.1039/d3nr04917e), 2024-01-01
Supplement: d3nr04917e1.pdf [file d3nr04917e1.pdf]

## Supporting Information

### Effects of Thermal Annealing on Analog Resistive Switching Behavior in Bilayer HfO<sub>2</sub>/ZnO Synaptic Devices: The Role of ZnO Grain Boundaries

HAN YAN,<sup>a</sup> Yeong-Jin An<sup>a</sup>, Chae-min Yeom<sup>a</sup>, Jun-kyo Jeong<sup>a</sup>, Sunil Babu Eadi<sup>b</sup>, Hi-Deok Lee<sup>\*a</sup> and Hyuk-Min Kwon<sup>\*b</sup>

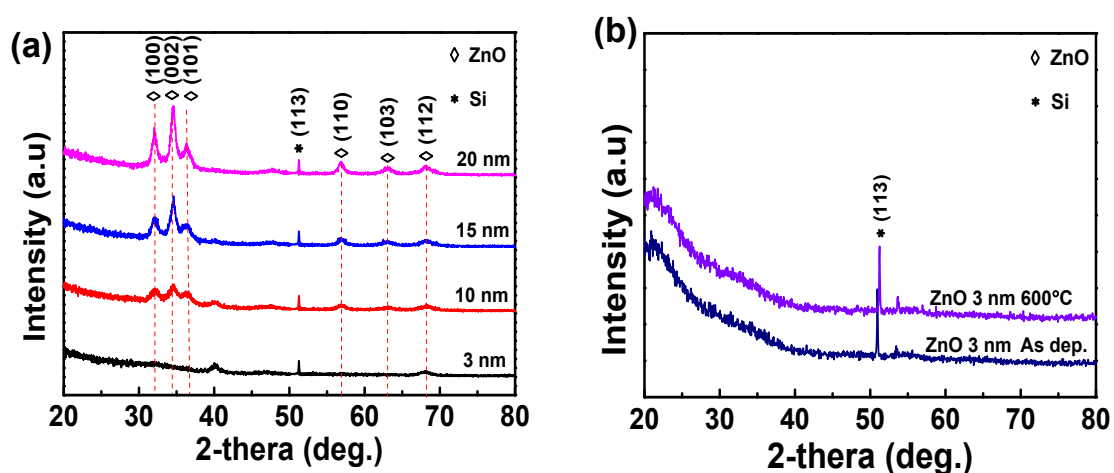

Figure S1. X-Ray diffraction spectra of (a) the active ZnO layer thickness from 3 nm to 20 nm without thermal annealing. (b) HfO<sub>2</sub>/3 nm ZnO films on annealing temperature. All samples exhibit a common XRD peak at around 51°, which originates from the Si substrate.

Figure S1 showed the XRD diffraction spectra of the active ZnO layer thickness from 3 nm to 20 nm without thermal annealing on Si/SiO<sub>2</sub> substrate. The crystal orientation of the ZnO film was favored in the Z-axis direction and appeared in the (002) crystal plane. The diffraction peaks below the 10 nm ZnO films were not observed in the XRD results as shown in Figure S1(a), which means broad diffraction peaks and low signal-to-noise ratios due to the formation of amorphous and/or nanocrystalline structures in ZnO deposited samples. Also, the diffraction peaks of the HfO<sub>2</sub>/3 nm ZnO films on annealing temperature were not observed in the XRD results as shown in Figure S1(b). Therefore, we propose XRD diffraction spectra analysis on annealing temperature at the active 10 nm ZnO film to examine the tendency of crystallization.

<sup>a</sup>Department of Electronics Engineering, Chungnam National University, Daejeon, 34134, Republic of Korea.

<sup>b</sup>Department of Semiconductor Processing Equipment, Semiconductor Convergence Campus of Korea Polytechnic College, Anseong, Kyunggi-Do, 17550, Republic of Korea.

\*Corresponding authors: hdlee@cnu.ac.kr (H. D. Lee); hmkwon@kopo.ac.kr (H. M. Kwon).

†Electronic supplementary information (ESI) available. DOI:

## Supporting Information

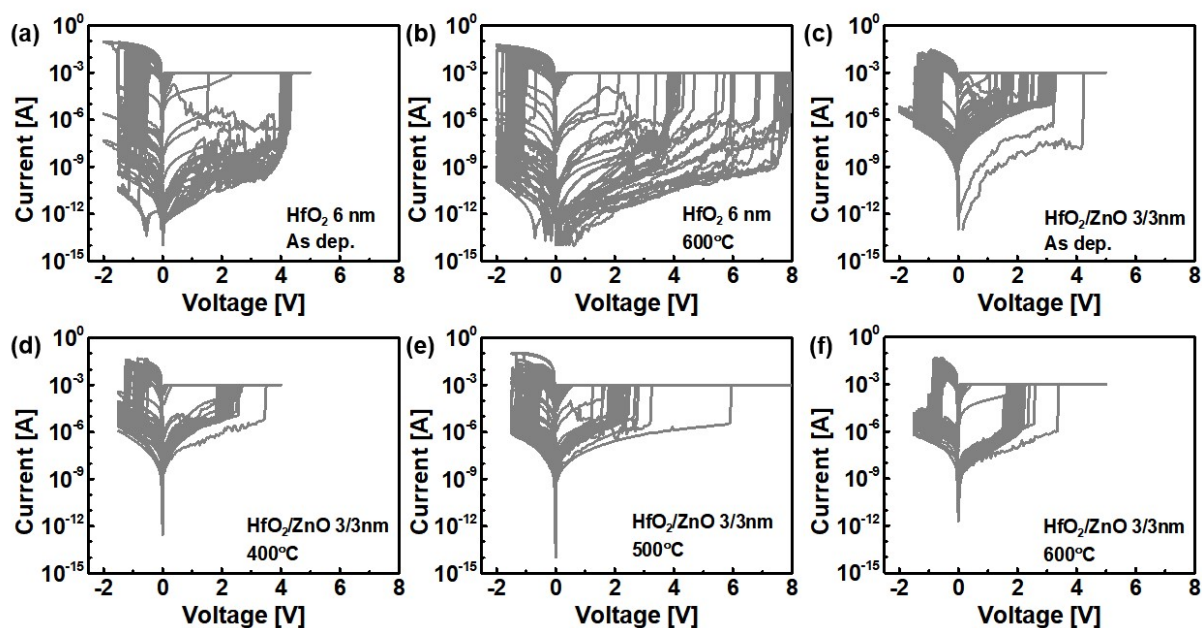

Figure S2. I-V resistive switching cycle behaviors of 40 synaptic devices for single layer (a) HfO<sub>2</sub> and (b) within thermal annealing, bilayer HfO<sub>2</sub>/ZnO synaptic devices (c) without and with thermal annealing at (d) 400°C, (e) 500°C, and (f) 600°C for 1 h in an N<sub>2</sub> ambient.

Figure S2 shows the measured forming cycles of 40 synaptic devices for each structure. It illustrates variations between devices and extracts the initial state and low-resistance state (LRS). In Figure 4, the uniformity of HfO<sub>2</sub>/ZnO bi-layer synaptic devices is shown to be superior to that of HfO<sub>2</sub> single-layer synaptic devices. Additionally, an increase in annealing temperature correlates with improved performance.

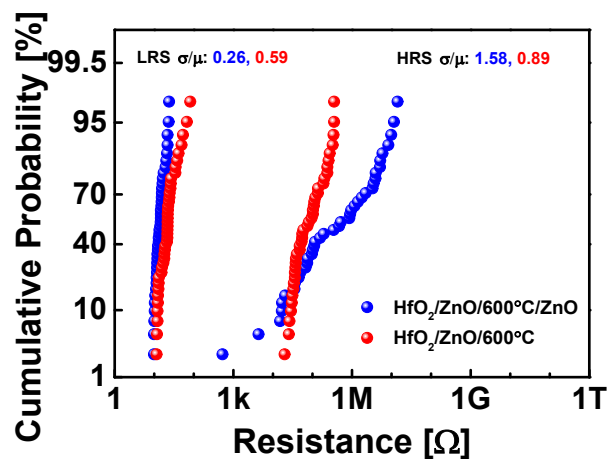

Figure S3. Distribution and cumulative probability of the high-resistance state (HRS) and low-resistance state (LRS) for bilayer 3 nm HfO<sub>2</sub>/3 nm ZnO synaptic devices with thermal annealing at 600°C and bilayer 3 nm HfO<sub>2</sub>/3 nm ZnO-thermal annealing at 600°C/3 nm ZnO synaptic devices, where the HRS and LRS were extracted at a read voltage of  $\pm 0.3$  V.

Figure S3 showed the distribution and cumulative probability of HRS and LRS for the added 3 nm ZnO films after a bilayer 3 nm HfO<sub>2</sub>/3 nm ZnO structure with thermal annealing at 600°C. The added ZnO films caused the cumulative probability and distribution degradation of HRS and LRS. As result, the resistive switching behavior based on ZnO film synaptic devices was not improved by simply increasing the thickness without thermal annealing.

## Supporting Information
